# Supplementary material
Source: Springer Nature journal article supplement (https://www.springermedizin.de/resource/supplementary/12955_2010_738_MOESM2_ESM.pdf/9560886)

**Figure 1: Pooled Estimate in SMD Units**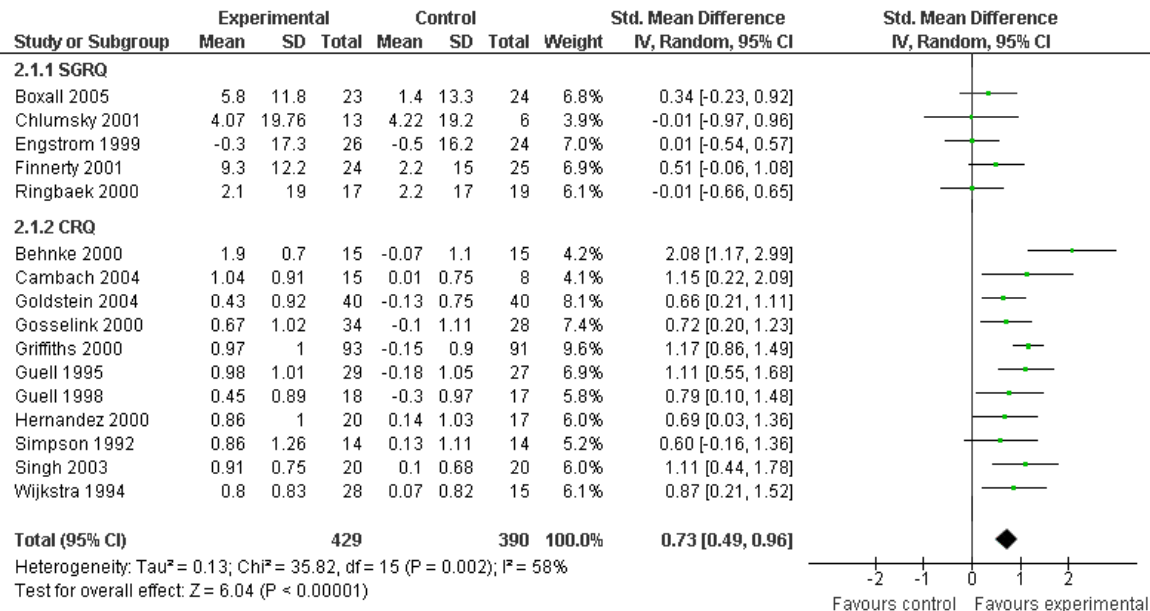

Supplement: MOESM2 [file 9560886]
